# Supplementary material for: The Co-benefits of a Low-Carbon Future on Air Quality in Europe
Source: Copernicus journal article supplement (doi:10.5194/egusphere-2024-755), 2024-03-21
Supplement: Supplementary file [file egusphere-2024-755-AC1-supplement.pdf]

1) Updated figure 2 with bias and clearer symbols.

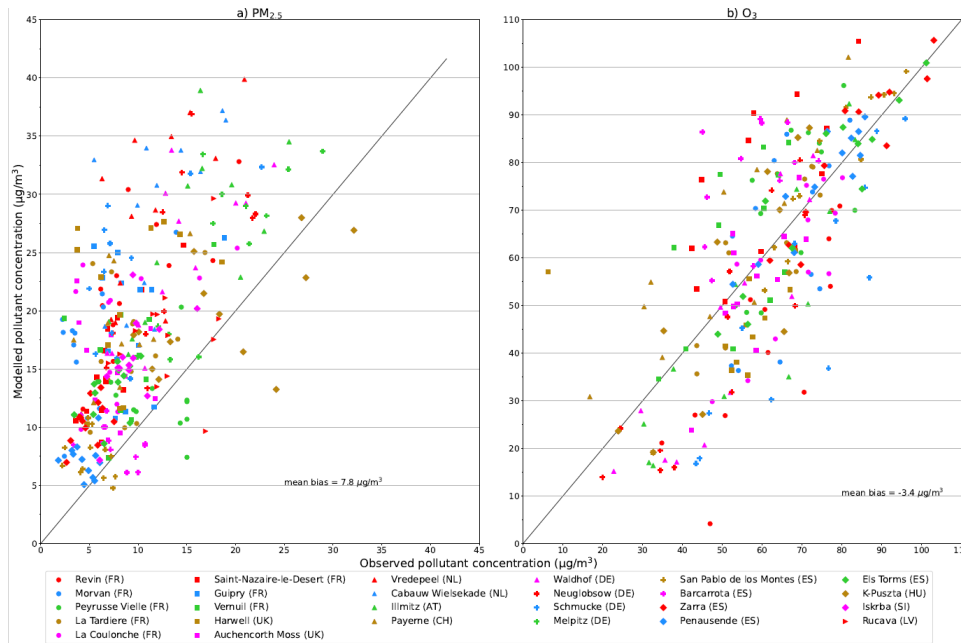

2 and 3) Absolute changes in PM<sub>2.5</sub> and O<sub>3</sub> across scenarios.

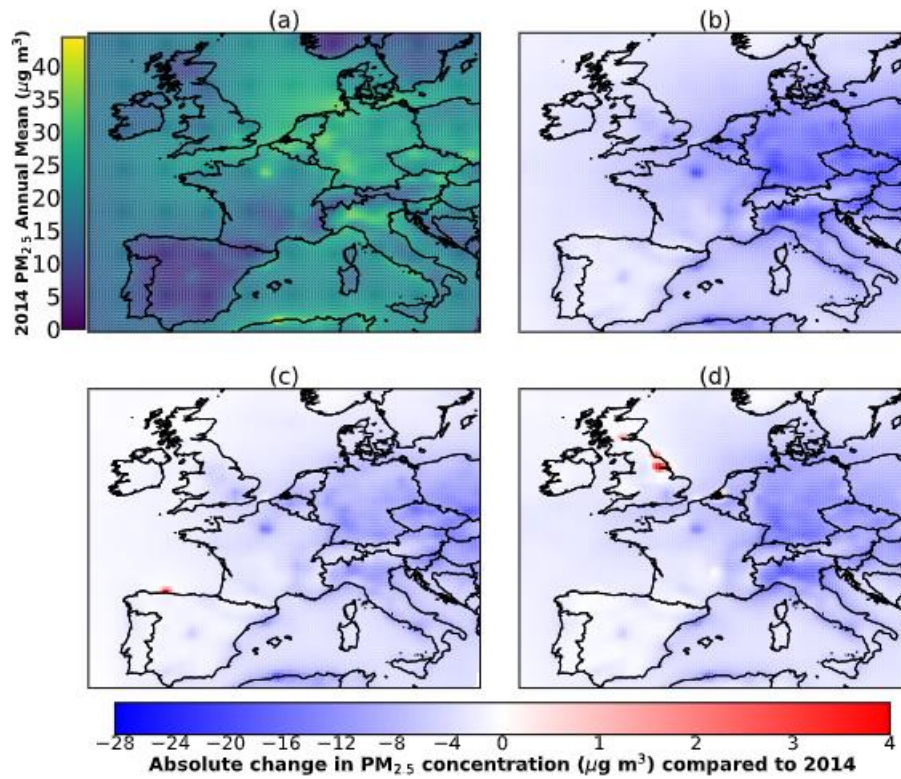

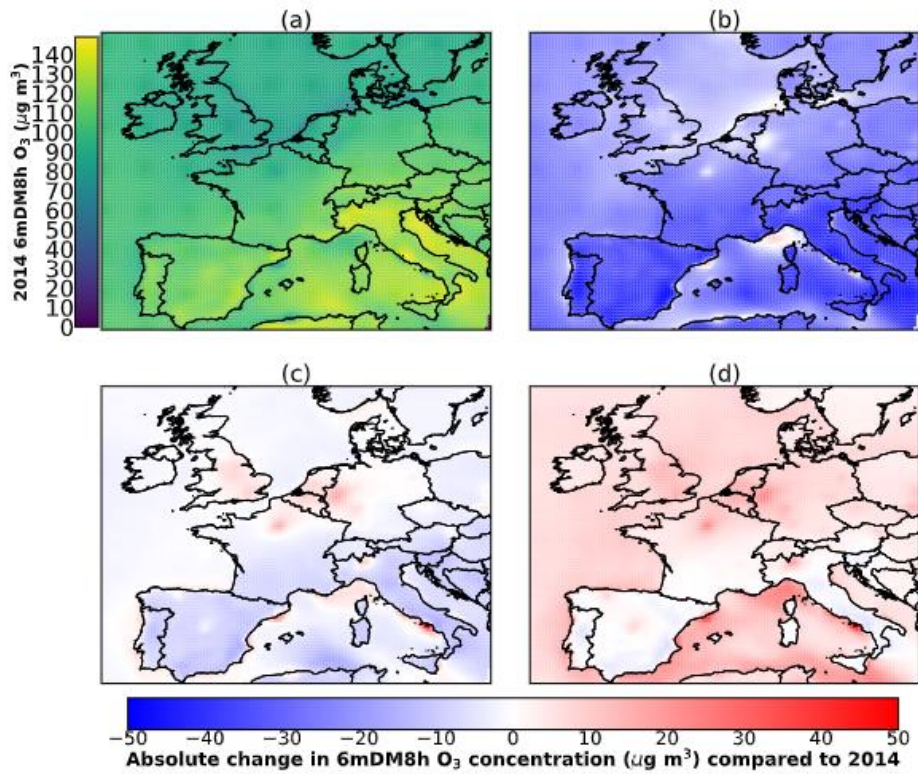

Figures 4, 5 and 6) Changes in NH<sub>3</sub>, NO<sub>x</sub> and SO<sub>2</sub> emissions respectively between the present and all future scenarios

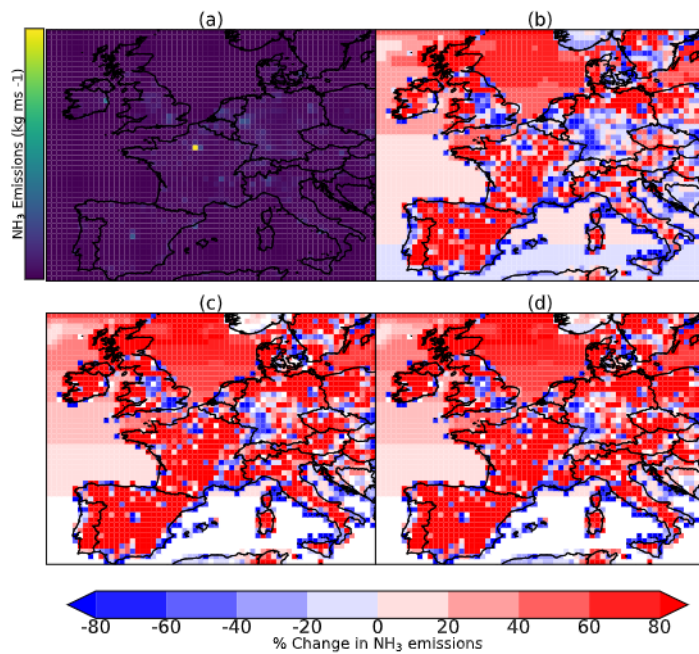

Figure A3. Annual mean NH<sub>3</sub> emissions for each scenario. (a) shows this metric for 2014. (b),(c) and (d) show the percentage change from this for SSP1-2.6, SSP2-4.5 and SSP3-7.0 in 2050 respectively.

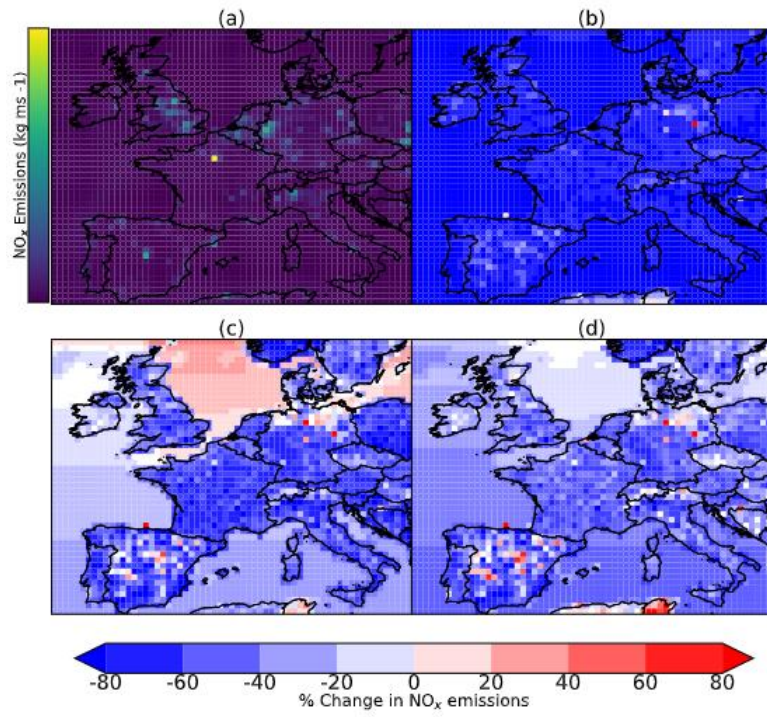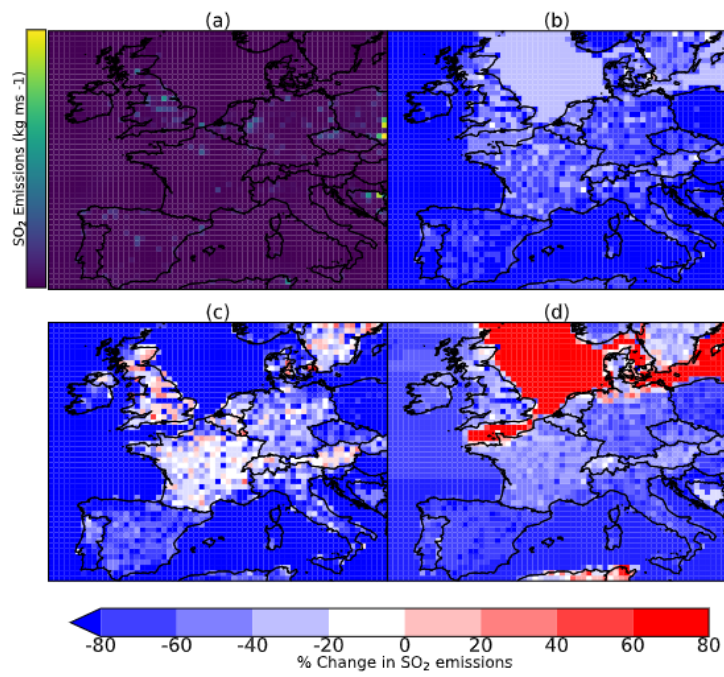

Figure 7) Change in NO<sub>2</sub> concentrations in all scenarios



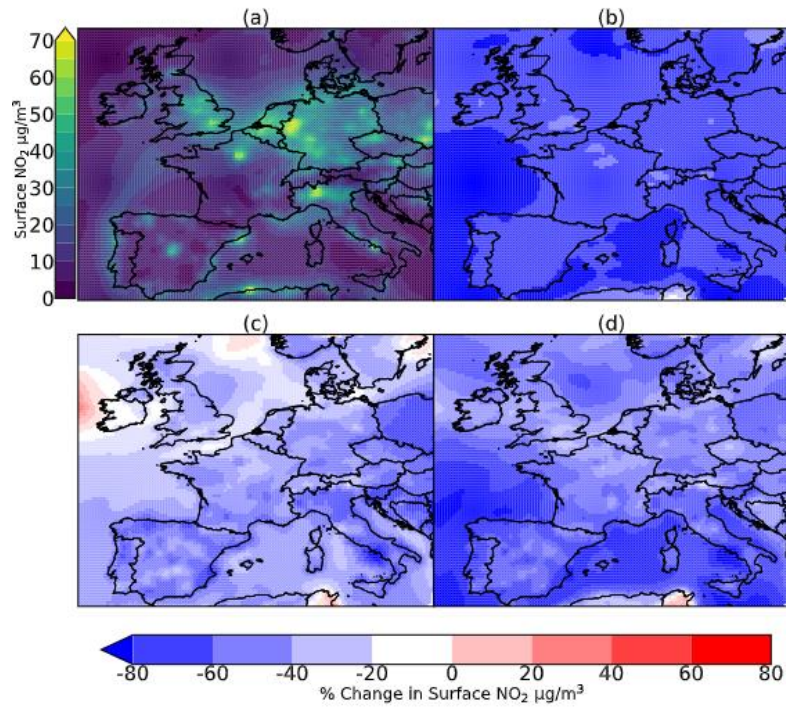

**Figure A7.** Annual mean NO<sub>2</sub> for each scenario. (a) shows this metric for the CMIP6 2014 simulation. (b),(c) and (d) show the percentage change from this for SSP1-2.6, SSP2-4.5 and SSP3-7.0 respectively.
